# Supplementary material for: Designing novel morphologies of l-cysteine surface capped 2D covellite (CuS) nanoplates to study the effect of CuS morphologies on dye degradation rate under visible light
Source: Royal Society of Chemistry journal article supplement (doi:10.1039/d0ce00421a), 2020-01-01
Supplement: d0ce00421a1.pdf [file d0ce00421a1.pdf]

## Supplementary Information

### Design novel morphologies of L-cysteine surface capped 2D covellite (CuS) nanoplates and study the effect of CuS morphologies on dye degradation rate under visible light

Shahid Iqbal<sup>1‡\*</sup>, Ali Bahadur<sup>2‡\*</sup>, Shoaib Anwer<sup>3</sup>, Muhammad Shoaib<sup>4</sup>, Guocong Liu<sup>1</sup>, Hao Li<sup>1</sup>, Muhammad Raheel<sup>5</sup>, Mohsin Javed<sup>6</sup>, Bilal Khalid<sup>7</sup>

<sup>1</sup>*School of Chemistry and Materials Engineering, Huizhou University, Huizhou 516007, Guangdong China.*

<sup>2</sup>*Department of Transdisciplinary Studies, Graduate School of Convergence Science and Technology, Seoul National University, Seoul, 16229, South Korea.*

<sup>3</sup>*Department of Mechanical Engineering, Khalifa University, P. O. Box: 127788. Abu Dhabi, United Arab Emirates.*

<sup>4</sup>*Department of Chemistry, Government Postgraduate College Samanabad, 38000 Faisalabad, Pakistan.*

<sup>5</sup>*Department of Chemistry, Balochistan University of Information Technology, Engineering and Management Sciences, Quetta, Pakistan.*

<sup>6</sup>*Department of Chemistry, School of Science, University of Management & Technology, Lahore-54770, Pakistan.*

<sup>7</sup>*Department of Chemistry, University of Okara, Renala Khurd, Okara, Punjab, Pakistan.*

#### **\*To whom corresponding should be addressed**

[shahidiqbal@hzu.edu.cn](mailto:shahidiqbal@hzu.edu.cn) (Shahid Iqbal), [alibahadur138@snu.ac.kr](mailto:alibahadur138@snu.ac.kr) (Ali Bahadur) and [gcl\\_109@163.com](mailto:gcl_109@163.com) (Guocong Liu)

‡ *Authors contributed equally*

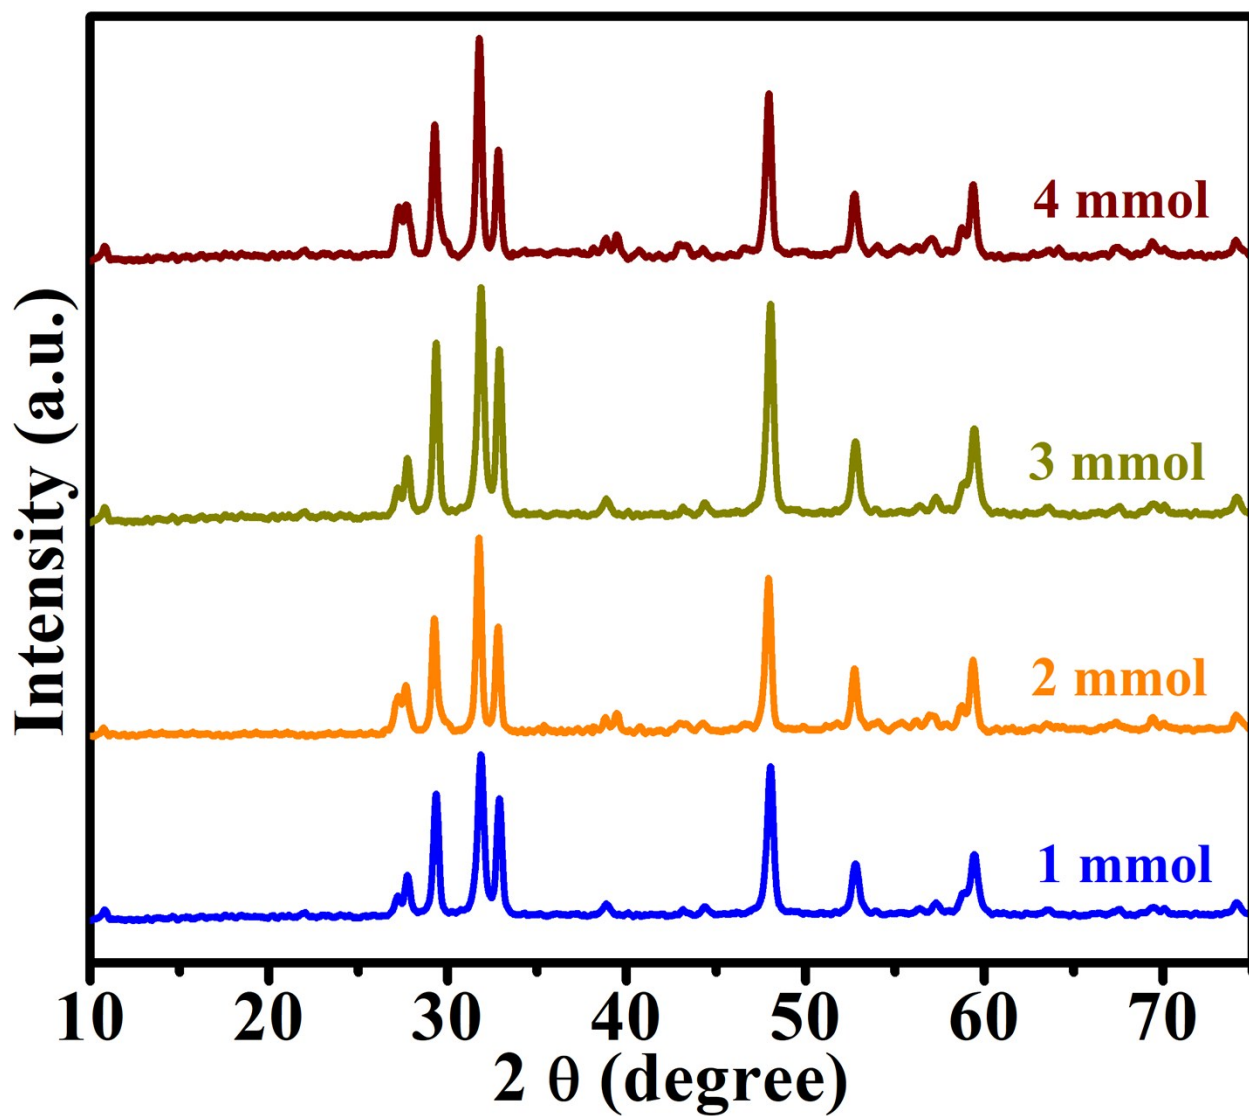

**Fig. S1.** XRD pattern of CuS NPs at 180 °C at different concentrations of thiourea (a) 1 mmol (b) 2 mmol, (c) 3 mmol and (d) 4 mmol.

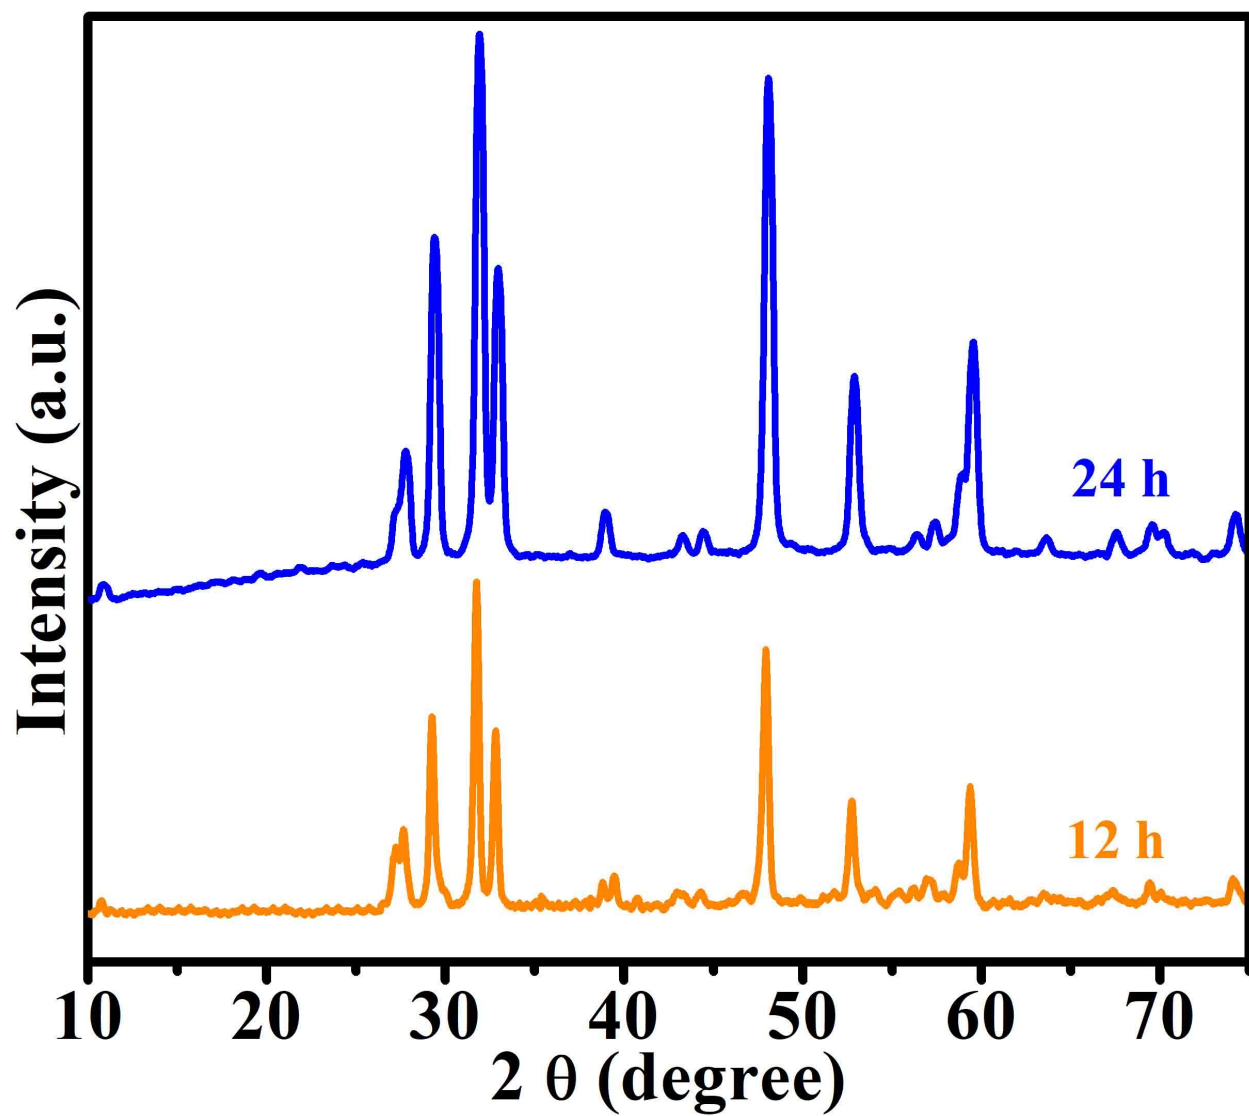

Fig. S2. XRD pattern of CuS NPs at 180 °C at molar concentrations of  $\text{CuCl}_2$  (5 mmol), thiourea (6 mmol), NaOH (8 mmol) with different reaction times (a) 12 h and (b) 24 h.
